# Supplementary material
Source: PubMed Central journal article supplement (PMC3479579)
Supplement: 1203870109_pnas.201203870SI.pdf [file 1203870109_pnas.201203870SI.pdf]

# Supporting Information

Vaeth et al. 10.1073/pnas.1203870109

## SI Materials and Methods

**Mice and Cells.** *Nfat2<sup>fl/fl</sup>* (nuclear factor of activated T-cells) animals were generated in A. Rao's laboratory (Harvard Medical School, Boston, MA). *Nfat1<sup>-/-</sup> × Nfat4<sup>-/-</sup>*, B6-Tg (Cd4-cre) 1Cwi/Cwilbcm (European mouse mutant archive, Rome, Italy) and *Foxp3-IRES-cre* have been described previously (1–3). Animals were used at 6–16 wk and maintained in accordance with institutional guidelines for animal welfare. Blood from healthy donors was obtained after informed consent, in accordance with the Declaration of Helsinki, under a protocol that received approval from the Institutional Review Board from the Johannes Gutenberg university hospital in Mainz.

**Antibodies, Reagents, and Media.** mAbs against CD3e (145-2C11), CD28 (37.51; both BD Pharmingen), and CD4 (YTS177.9; BioXcell), as well as superagonistic CD28 mAb D665 (CD28SA; Serotec), were used as previously described (4). Recombinant hIL-2 (50 U/mL), hIL-6 (50 ng/mL), mIL-12 (10 ng/mL), hIL-21 (65 ng/mL), mIFN- $\gamma$  (50 ng/mL), hTGF- $\beta$ 1 (1–5 ng/mL), and mIL10 (20 ng/mL; all PeproTech), anti-IL-2 (5  $\mu$ g/mL; eBioscience), anti-IL-4 and anti-IFN $\gamma$  (both 2.5  $\mu$ g/mL; R&D Systems), 5 12-*O*-tetradecanoyl-phorbol-13-acetate (TPA, 10 ng/mL; Sigma), ionomycin (5 nM; Merck Biosciences), and cyclosporin A (CsA; Calbiochem) were used as indicated. CD4<sup>+</sup> T cells were cultivated in RPMI 1640 (5, 6).

**Preparation of T-Cell subsets.** Human T-cell subsets were isolated and stimulated as shown previously (7, 8). Murine CD4<sup>+</sup>CD25<sup>+</sup> naturally occurring regulatory T cells (nTreg) and CD4<sup>+</sup>CD25<sup>-</sup> conventional naive CD4<sup>+</sup> T cells (Tconv) were isolated (6) using Dynal Mouse T Cell Negative Isolation Kit (Invitrogen) followed by staining with anti-CD25-PE mAb and anti-PE MACS beads enrichment (Miltenyi Biotec).

**Cell Culture and Stimulations.** Priming and restimulation of primary T cells was performed using plate-bound anti-CD3 mAb (145-2C11, 5  $\mu$ g/mL) plus anti-CD28 mAb (37.51, 1  $\mu$ g/mL) (both BD Pharmingen). After 72 h the cells were washed and cultured on fresh plates for additional 96 h. For intracellular cytokine analysis cells were stimulated for 6 h with TPA/Iono in presence of GolgiPlug and GolgiStop (both BD Pharmingen).

**FACS Staining.** FACS staining (6) was carried out with the following Ab: fluorescein isothiocyanate (FITC)-conjugated CD4 (GK1.5), CD8 $\alpha$  (53-6.7), CD19 (1D3), GITR (DTA-1); phycoerythrin (PE)-conjugated CD3e (145-2C11), CD4 (RM4-5), CD19 (1D3), CD25 (PC61), CD39 (24DMS1), CD73 (eBioTY/11.8) CD103 (2E7), CD107a (eBio1D4B), OX-40 (OX-86), Lag3 (eBioC9B7W), CTLA-4 (UC10-4B9); allophycocyanin (APC)-conjugated CD8 $\alpha$  (53-6.7); eFluor710-conjugated GARP (YGIC86) and LAP (TW7-16B4); biotin-conjugated CD3e (145-2C11), CD4 (GK1.5), and CD90.2 (53-2.1), and secondary streptavidin-HRP, streptavidin-APC or streptavidin-PE mAb (all BD Pharmingen). Intracellular Foxp3 (FJK-16s, FITC-, PE-, and APC-conjugated), Helios (22F6, FITC-conjugated, BioLegend), and cAMP (SPM486, Abcam), together with donkey-anti-mouse-AlexaFluor555 (Invitrogen), staining was performed using the Foxp3 staining kit (eBiosciences). Cytokine staining for IL-2-APC (JES6-5H4), IFN- $\gamma$ -APC (XMG1.2), IL-17-PE (eBio17B7), and TNF $\alpha$ -PE (MP6-XT22) was performed using the IC Fixation Buffer Kit (eBioscience). Samples were analyzed on a FACS Calibur (BD

Biosciences) with CellQuest (BD Biosciences) and FlowJo software (TreeStar).

**ELISA.** Cells ( $1 \times 10^6$ /mL) were cultivated as indicated for 48 h. The supernatant was analyzed by IL-2 ELISA (eBiosciences).

**Calcium Measurement.** Splenic CD4<sup>+</sup> T cells ( $1 \times 10^7$ ) were incubated in medium containing 5% (vol/vol) FCS, 1  $\mu$ M Indo-1-AM (Invitrogen), and 0.015% Pluronic F127 (Invitrogen) at 30 °C for 25 min. The cell suspension was then diluted with 700  $\mu$ L medium containing 10% (vol/vol) FCS and incubated at 37 °C for another 10 min. The cells were washed twice with PBS followed by surface staining with anti-CD4-PacificBlue, anti-CD25-PE, and biotinylated anti-CD3e (all eBioscience). For calcium measurement, cells were diluted 1:10 in PBS containing 0.5 mM EGTA, and a baseline was recorded for 60 s. Ca<sup>2+</sup> movement was assessed after streptavidin-HRP cross-linking (eBioscience), followed by the addition of 1 mM Ca<sup>2+</sup> after 3.5 min and Iono after 9 min of recording. After 12 min, another baseline of unstimulated cells was recorded as control. Increases in free intracellular Ca<sup>2+</sup> were measured in real-time on an LSR II (BD), and data were analyzed as median in comparative overlays with FlowJo software (TreeStar).

**Proliferation Assays.** Proliferation assay (6) was measured using a Mach 2 Harvester (Tomtec).

**Immunofluorescence.** For confocal microscopy (5, 6) the following primary antibodies were used: anti-NFAT2 (7A6; BD Pharmingen), anti-NFAT1 (IG-209; immunoGlobe), anti-Smad3 (ab28379; Abcam), and anti-Foxp3 (FJK-16s; eBiosciences). Secondary staining was performed using Abs: anti-rabbit Alexa-Fluor 647, anti-mouse Alexa-Fluor 488, and anti-rat Alexa-Fluor 555 (all Molecular Probes). Slides were mounted with Fluoromount-G (Southern Biotechnology) containing DAPI. Images were taken with a confocal microscope (Leica TCS SP2 equipment, objective lens; HeX PL APO, 40 $\times$ /1.25–0.75) and LCS software (Leica). For statistics, more than 100 cells from at least three independent experiments were counted, and mean fluorescence intensity per cell was calculated.

**Immunoblot.** Protein lysate was made with radioimmunoprecipitation assay buffer (RIPA) buffer and measured using bicinchoninic acid (BCA) reagent (BioRad). Equal amount of protein was fractionated by 8–12% SDS/PAGE and electroblotted on membranes (5). For detection, anti-NFAT2 (7A6; BD Pharmingen), anti-NFAT1 (IG-209; immunoGlobe), anti-NFAT4 (F-1; Santa Cruz Biotechnology), and anti- $\beta$ -actin (C4; Santa Cruz Biotechnology) with anti-mouse or anti-rabbit peroxidase-coupled secondary antibodies were used.

**PCR and Quantitative RT-PCR.** Genomic DNA was prepared with DNA-lysis buffer (including 0.2% SDS). PCR was performed using the following primers (5'→3'): *Nfat2* CCTATTTAAAC-ACCTGGCTCCCTGCG plus CCATCTCTCTGACCAACAG-AAGCC AG,  $\Delta$ exon3 CTAGGCCTCAGGCGTTCCACC plus CCTGCCTCTCAGCCTTTGA, *Cebp* CGAGCCACC GCG-TCCCTCCAGC plus CCGGTGCGTGC GCGTACATTGC. RNA was extracted using the RNeasy Micro Kit (Qiagen) followed by cDNA synthesis which was performed with the iScript II Kit (BioRad). Real-time quantitative RT-PCR was carried out with an ABI Prism 7700 detection system using the following primers: *Nfat1* TCATAGGAGCCCCGACTGATTG plus CCATTCC-

CATCTGCAGCAT, *Nfat2* GATCCGAAGCTCGTATGGAC plus AGTCTCTTTCCCGACATCA, *Nfat4* CACATCCCACAGCCCAGTG plus CACATCCCACAGCCCAGTG normalized to  $\beta$ -actin GACGGCCAGGTCATCACTATTG plus AGGAA-GGCTGGAAAAGAGCC.

**ChIP Analysis.** ChIP-IT Express kit (Active Motif) was used according to the manufactures' instructions, except for enzymatic shearing followed by additional sonication. The following IP-Abs were used: anti-NFAT2 (7A6; BD Pharmingen), anti-Foxp3 (FJK-16s; eBioscience), and anti-Smad3 (Abcam). Primers (5'→3') used were: Foxp3-Pr CTTCCCATTCACATGGCAGGC plus CTTTGGCCCTTACAAGTCATCTG; Foxp3-CNS1 GCACTTG-AAAATGAGATAACTGTTC plus CATCACAGTACATACGA-GGAAATG; and Foxp3-CNS3 CCAGATGGACGTCACCTACC plus GGCGTTCCTGTTT-GACTGTTC.

**Electromobility Shift Assay (EMSA).** Nuclear proteins from human and murine T-cell subsets were prepared and stored by ProteoJET Kit (Thermo Scientific). *hFoxp3-Prom-NFAT* GTTCTTCTTCC-TTGTTTTTTTTT; *mFoxp3-Prom-NFAT* GACTTATTTTCCCT-CAGTTTTTTTTT; *mFoxp3-CNS1-NFAT* GCTTCATTTTTTCC-ATTTACTG; *mIL2-Pubd* CCCCAAAGAGGAAAATTTGTTT (boldface, NFAT consensus sites); anti-NFAT1 (D43B1, Cell Signaling), and anti-NFAT2 (7A6, BD Pharmingen) were used for EMSA, which was performed as previously described (9).

**Microarray.** CD4<sup>+</sup>CD25<sup>+</sup> nTregs and CD4<sup>+</sup>CD25<sup>-</sup> Tconv from WT or *Nfat1*<sup>-/-</sup> × *Nfat2*<sup>fl/fl</sup> × *Cd4-cre* (DKO) mice were isolated and stimulated for 24 h with plate-bound anti-CD3/28 in absence (Tconv and nTreg) or presence (iTreg conditions) of 5 ng/mL TGF- $\beta$ , followed by RNA extraction using the standard TRIzol method (Invitrogen). Biotin-labeled amplified aRNA was prepared using the GeneChip 3' IVT Express Kit and hybridized to GeneChip mouse genome 430 2.0 arrays (Affymetrix) according to the manufacturer's protocols. The trimmed mean signals of the probe arrays were scaled to a target value of 500 and expression values determined using Affymetrix GeneChip Operating Software. Data were analyzed and visualized as a heat map using GeneSpring GX 12.0 software (Agilent Technologies). The original microarray data can be found in the ArrayExpress

database under the accession no. E-MEXP-12345 ([www.ebi.ac.uk/arrayexpress](http://www.ebi.ac.uk/arrayexpress)).

**CD28SA Treatment.** Treatment of mice with superagonistic CD28 mAb D665 was performed as previously described (4). Mice received a single i.p. injection of 250  $\mu$ g CD28SA D665 (Serotec) or PBS as control. After 60 h serum samples were obtained from tail vein. Spleen and LN cells were harvested on day 3 post injection.

**Adoptive Transfer Colitis and Endoscopy.** Colitis was induced in *Rag1*<sup>-/-</sup> mice by injecting i.p.  $2.5 \times 10^5$  *Cd90.1*<sup>+</sup> (WT) and  $2.5 \times 10^5$  *Cd90.2*<sup>+</sup> (WT or *Nfat2*<sup>fl/fl</sup> × *Cd4cre*) CD4<sup>+</sup>CD62L<sup>+</sup>CD25<sup>-</sup> cells. Mice were anesthetized [100  $\mu$ L of a mixture of 100 mg/mL Ketavest (Pfizer) and Rompun (Bayer Healthcare) i.p.] and clinical symptoms [murine endoscopic index of colitis severity (ME-ICS): total range 0–15 points; colon translucency (0–3 points), presence of fibrin (0–3 points), mucosa granularity (0–3 points), vascular pattern (0–3 points), and stool (0–3 points)] were analyzed with a high-resolution video endoscopic system (Karl Storz) (10).

**Skin Transplant Model.** To test alloantigen-induced or nTreg in vivo (11, 12) mice received 200  $\mu$ g of anti-CD4 YTS177.9 mAb (Bio-Xcell) i.v. on day -28/-27. On day -27 the mice also received 250  $\mu$ L donor-specific blood transfusions (DST) from BALB/c mice. CD4<sup>+</sup>CD25<sup>+</sup> T cells were FACS-sorted on day 0, and C57BL/6 *Rag2*<sup>-/-</sup> mice were reconstituted i.v. with  $2 \times 10^5$  C57BL/6 CD4<sup>+</sup>CD45RB<sup>hi</sup> cells along with  $5 \times 10^5$  CD4<sup>+</sup>CD25<sup>+</sup> nTreg cells isolated from naïve or  $2 \times 10^5$  CD4<sup>+</sup>CD25<sup>+</sup> Treg cells from YTS177/DST-pretreated mice. Next day, BALB/c tail skin allografts were transplanted onto flanks of reconstituted mice. Graft survival between groups was monitored and compared using the log-rank test. For transfer of in vitro-generated iTregs, naïve CD4<sup>+</sup>CD25<sup>-</sup> T cells were cocultivated with BALB/c CD19<sup>+</sup> B cells in the presence of IL-2, TGF- $\beta$ , anti-IL-12, anti-IFN- $\gamma$ , and the anti-CD4 YTS177 for 2 wk, with restimulation after 1 wk. FACS-sorted CD25<sup>hi</sup> T cells were verified for Foxp3 expression, and equal numbers were used in transplantation.

**Statistical Analysis.** Groups were compared with Prism software (GraphPad) using two-tailed Student's *t* test.

1. Lee PP, et al. (2001) A critical role for Dnmt1 and DNA methylation in T cell development, function, and survival. *Immunity* 15:763–774.
2. Ranger AM, Oukka M, Rengarajan J, Glimcher LH (1998) Inhibitory function of two NFAT family members in lymphoid homeostasis and Th2 development. *Immunity* 9: 627–635.
3. Wing K, et al. (2008) CTLA-4 control over Foxp3+ regulatory T cell function. *Science* 322:271–275.
4. Gogishvili T, et al. (2009) Rapid regulatory T-cell response prevents cytokine storm in CD28 superagonist treated mice. *PLoS ONE* 4:e4643.
5. Nayak A, et al. (2009) Sumoylation of the transcription factor NFATc1 leads to its subnuclear relocalization and interleukin-2 repression by histone deacetylase. *J Biol Chem* 284:10935–10946.
6. Vaeth M, et al. (2011) Regulatory T cells facilitate the nuclear accumulation of inducible cAMP early repressor (ICER) and suppress nuclear factor of activated T cell c1 (NFATc1). *Proc Natl Acad Sci USA* 108:2480–2485.
7. Becker C, et al. (2009) Protection from graft-versus-host disease by HIV-1 envelope protein gp120-mediated activation of human CD4+CD25+ regulatory T cells. *Blood* 114:1263–1269.
8. Kubach J, et al. (2007) Human CD4+CD25+ regulatory T cells: proteome analysis identifies galectin-10 as a novel marker essential for their energy and suppressive function. *Blood* 110:1550–1558.
9. Berberich-Siebelt F, et al. (2000) C/EBPbeta enhances IL-4 but impairs IL-2 and IFN-gamma induction in T cells. *Eur J Immunol* 30:2576–2585.
10. Weigmann B, et al. (2008) The transcription factor NFATc2 controls IL-6-dependent T cell activation in experimental colitis. *J Exp Med* 205:2099–2110.
11. Karim M, Kingsley CI, Bushell AR, Sawitzki BS, Wood KJ (2004) Alloantigen-induced CD25+CD4+ regulatory T cells can develop in vivo from CD25-CD4+ precursors in a thymus-independent process. *J Immunol* 172:923–928.
12. Sawitzki B, et al. (2005) IFN-gamma production by alloantigen-reactive regulatory T cells is important for their regulatory function in vivo. *J Exp Med* 201:1925–1935.

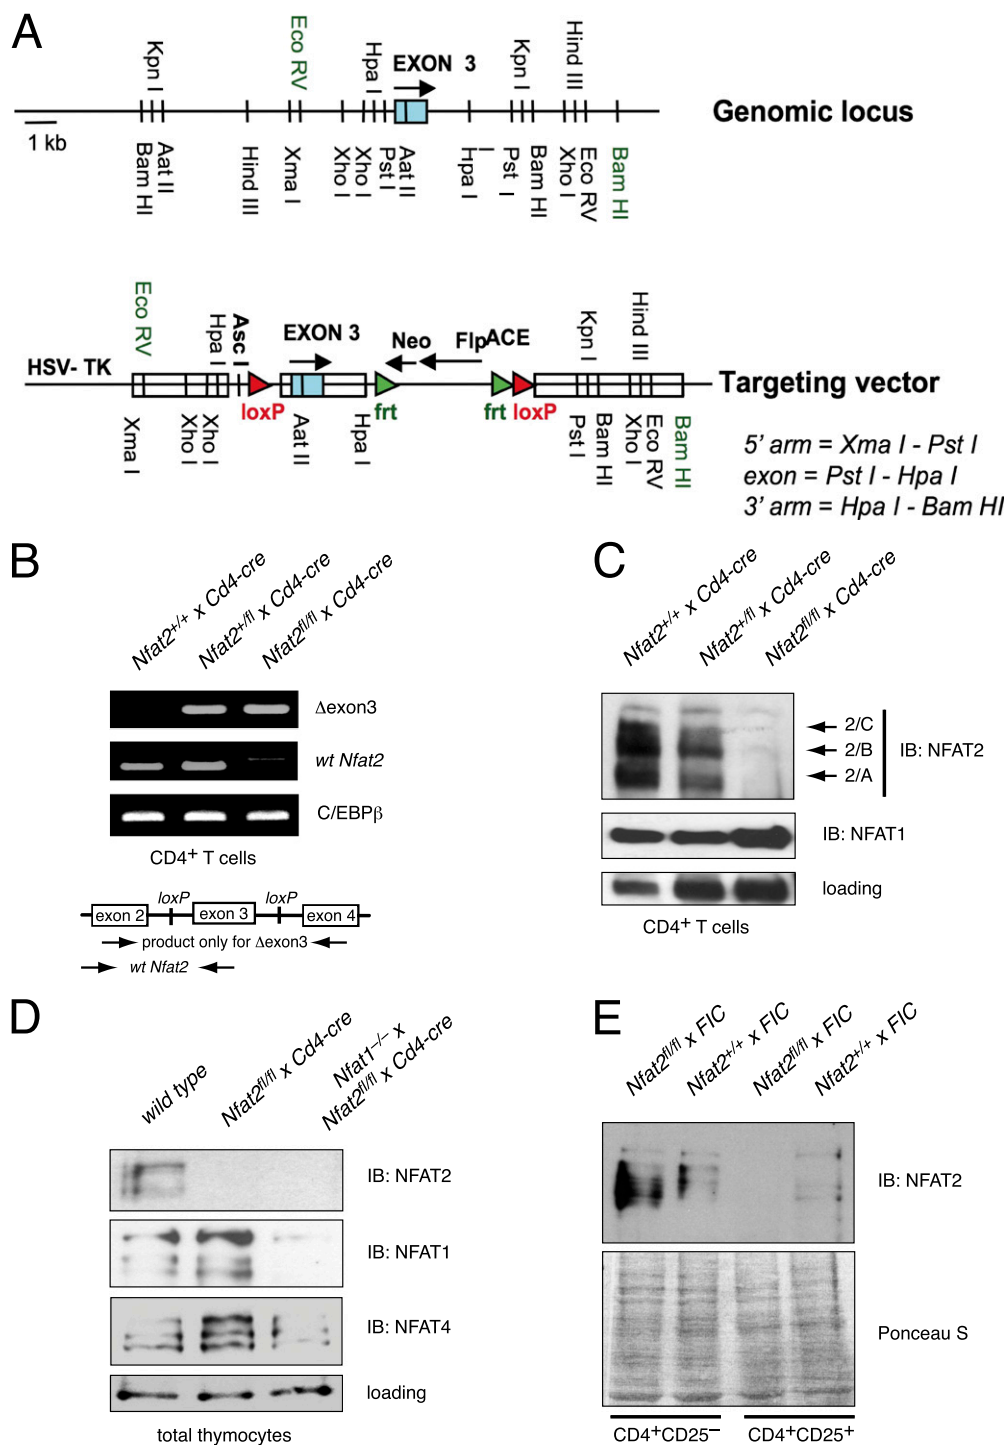

**Fig. S1.** Conditional disruption of *Nfat2* exon3 in mice. (A) Strategy for introduction of loxP sites into the mouse *Nfat2* locus flanking exon 3. Genomic locus of the *Nfat2* exon3 region (Upper) and the targeting vector containing a loxP sites flanked version of exon3 including a neomycin resistance cassette (Lower) bordered by frt sites. (B and C) Confirmation of conditional inactivation of *Nfat2* in CD4<sup>+</sup> T lymphocytes by CD4-mediated cre. (B) PCR analysis of genomic DNA of isolated CD4<sup>+</sup> T cells with specific primers for the loss of *Nfat2* exon3 ( $\Delta$ exon3) and total *Nfat2* (*wt Nfat2*) of WT (*Nfat2<sup>+/+</sup> × Cd4-cre*), heterozygous (*Nfat2<sup>fl/fl</sup> × Cd4-cre*), and knockout (*Nfat2<sup>fl/fl</sup> × Cd4-cre*) mice. (C) Immunoblot of protein from CD4<sup>+</sup> T cells of WT, heterozygous, and homozygous mice. Arrows indicate isoforms of NFAT2. (D) Breeding of *Nfat2<sup>fl/fl</sup> × Cd4-cre* mice to *Nfat1<sup>-/-</sup>* mice resulted in NFAT1NFAT2 double-deficient T lymphocytes. Immunoblot analysis of NFAT expression in total thymocytes from WT, *Nfat2<sup>fl/fl</sup> × Cd4-cre*, and *Nfat1<sup>-/-</sup> × Nfat2<sup>fl/fl</sup> × Cd4-cre* mice. (E) Foxp3-specific inactivation of *Nfat2* in Treg cells by *Foxp3-IRES-cre* (FIC). Immunoblot with proteins isolated from CD4<sup>+</sup>CD25<sup>-</sup> and CD4<sup>+</sup>CD25<sup>+</sup> T cells of WT and *Nfat2<sup>fl/fl</sup> × FIC* mice.

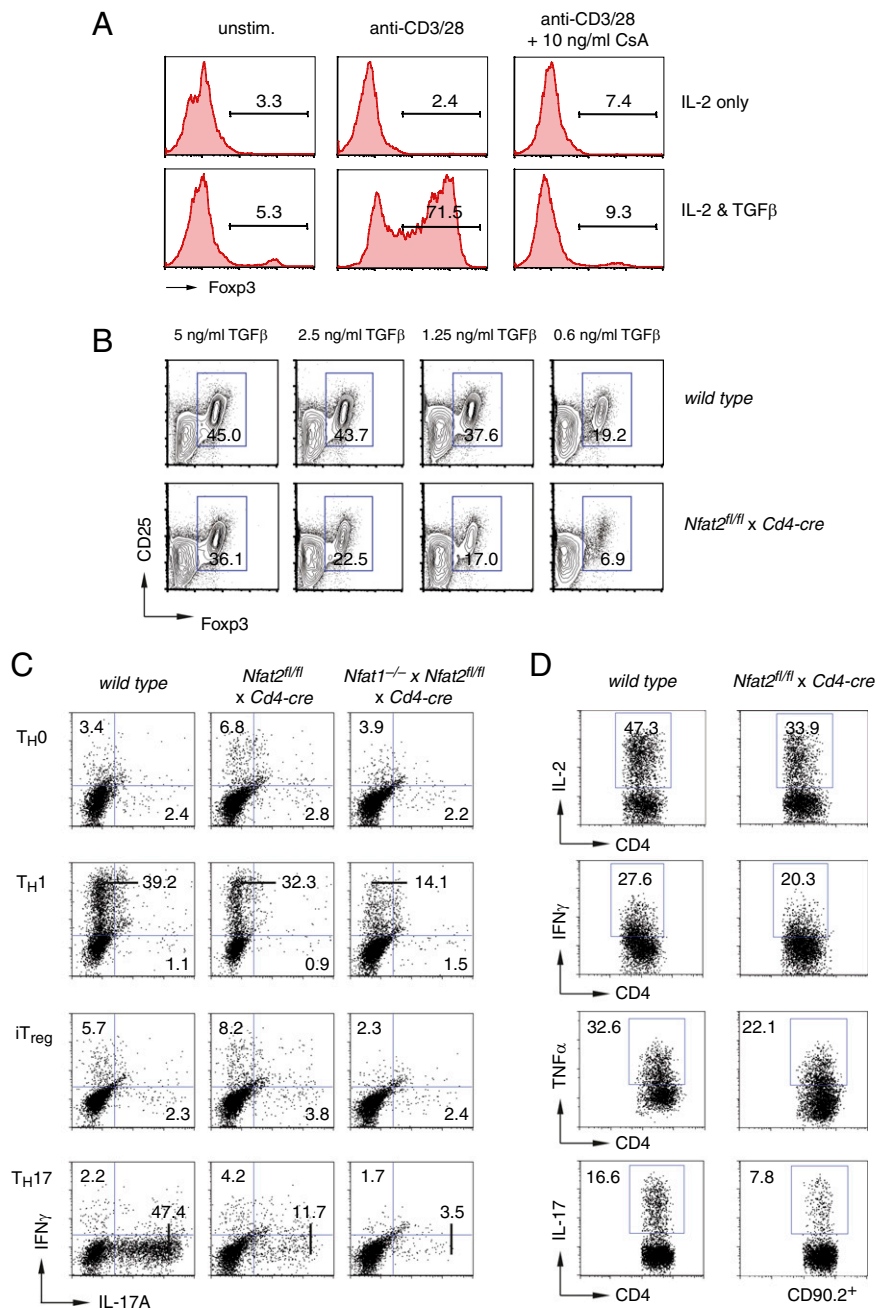

**Fig. S2.** Direct influence of NFAT on Foxp3 and cytokine induction. (A) TGF- $\beta$ -mediated iTreg induction of WT CD4<sup>+</sup>CD25<sup>-</sup> T cells is abrogated in the presence of 10 ng/mL CsA. (B) CD4<sup>+</sup>CD25<sup>-</sup> T cells from WT and *Nfat2<sup>fl/fl</sup>* x *Cd4-cre* mice were stimulated for 3 d with plate-bound anti-CD3/28 in the presence of IL-2 and different concentrations of TGF- $\beta$ , followed by rest of 4 d. Representative FACS analysis of CD4<sup>+</sup>CD25<sup>+</sup>Foxp3<sup>+</sup> T cells in culture. (C and D) Impaired cytokine expression in NFAT-deficient CD4<sup>+</sup> T cells. (C) CD4<sup>+</sup>CD25<sup>-</sup> T cells from WT, *Nfat2<sup>fl/fl</sup>* x *Cd4-cre*, and *Nfat1<sup>-/-</sup>* x *Nfat2<sup>fl/fl</sup>* x *Cd4-cre* mice were cultivated for 3 d with plate-bound anti-CD3/28 under  $T_H0$ - (IL-2, anti-IL-4, anti-IFN $\gamma$ ),  $T_H1$ - (IL-12, IFN $\gamma$ , anti-IL-4), iTreg- (IL-2, TGF- $\beta$ , anti-IL-4, anti-IFN $\gamma$ ), and  $T_H17$ -polarizing conditions (IL-6, IL-21, TGF- $\beta$ , anti-IL-4, anti-IFN $\gamma$ , anti-IL-2). Cells were restimulated for 6 h with TPA/Iono followed by intracellular IFN- $\gamma$  and IL-17 analysis using FACS. (D) Measurement of intracellular IL-2, IFN- $\gamma$ , TNF- $\alpha$ , and IL-17 of CD90.2<sup>+</sup> WT or CD90.2<sup>+</sup> *Nfat2<sup>fl/fl</sup>* x *Cd4-cre* T cells transferred into *Rag2<sup>-/-</sup>* (lymphopenic-induced colitis, parallel to Fig. 2 B–D; Fig. S4). Total cells from mLN were stimulated for 6 h with TPA/Iono followed by intracellular FACS-staining; gating on CD4 and CD90.2 identified WT or *Nfat2<sup>fl/fl</sup>* x *Cd4-cre* adoptively transferred T cells.



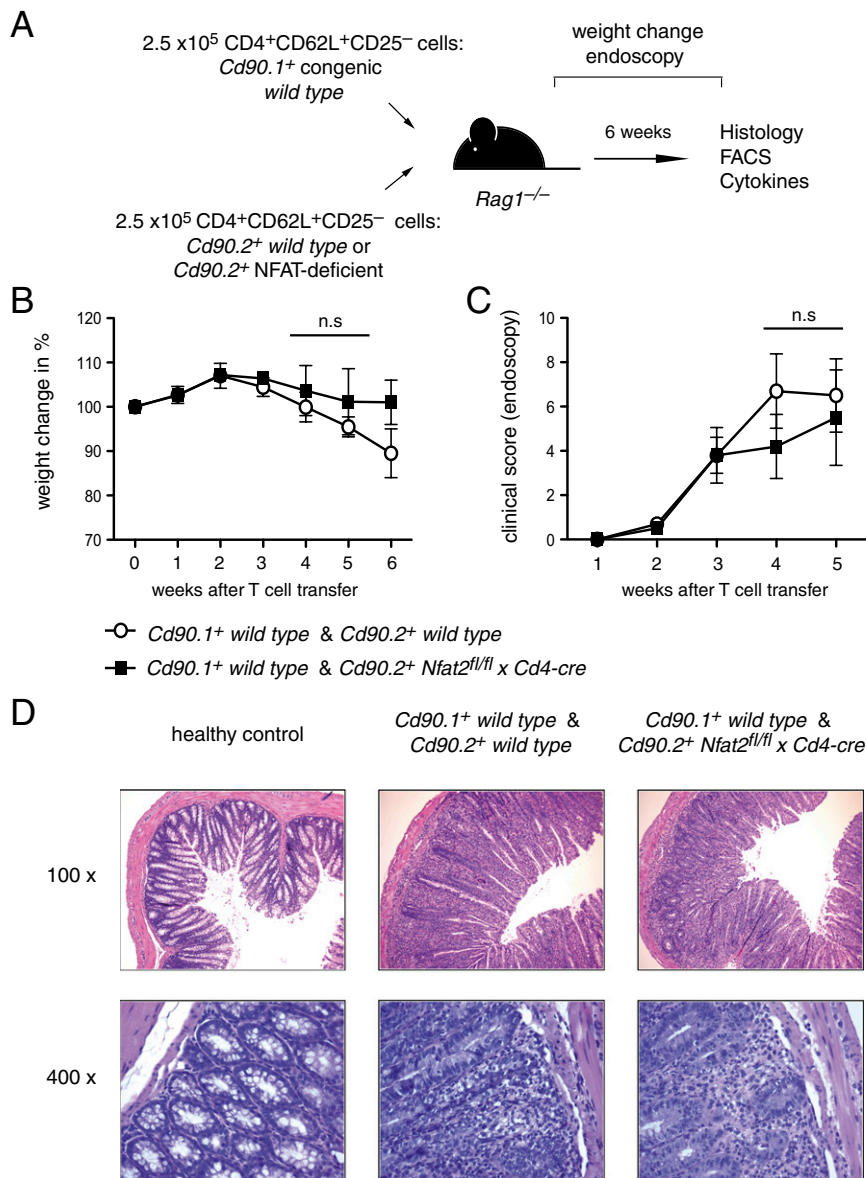

**Fig. 54.** Normal course of lymphopenia-induced colitis by NFAT2-deficient T cells. (A) Schematic overview of adoptive T cells transfer to induce colitis.  $2.5 \times 10^5$  CD90.2<sup>+</sup>CD4<sup>+</sup>CD62L<sup>+</sup>CD25<sup>-</sup> WT or NFAT-deficient T cells (*Nfat2*<sup>fl/fl</sup> × *Cd4-cre* or *Nfat1*<sup>-/-</sup> × *Nfat2*<sup>fl/fl</sup> × *Cd4-cre*) along with  $2.5 \times 10^5$  CD90.1<sup>+</sup>CD4<sup>+</sup>CD62L<sup>+</sup>CD25<sup>-</sup> congenic WT cells were injected i.p. into *Rag1*<sup>-/-</sup> recipient mice. (B–D) Normal course of colitis in *Rag1*<sup>-/-</sup> mice receiving NFAT2-deficient CD4<sup>+</sup>CD62L<sup>+</sup>CD25<sup>-</sup> T cells. (B) Monitoring weight change and (C) the clinical symptoms by colon endoscopy over 6 wk revealed only marginal differences in the characteristics of colitis in mice receiving either WT or *Nfat2*<sup>fl/fl</sup> × *Cd4-cre* T cells (five mice per group). (D) Representative H&E staining of paraffin-embedded colon sections showed no alteration of colitis in mice receiving either WT or *Nfat2*<sup>fl/fl</sup> × *Cd4-cre* T cells. As a reference a healthy colon (Left) in 100× and 400× magnification is given.



were cocultivated for 2 wk with allogenic BALB/c splenocytes in the presence of IL-2, TGF- $\beta$ , anti-IL-12, and anti-IFN $\gamma$ . Frequency of CD4<sup>+</sup>CD25<sup>+</sup> allogenic-induced iTreg was controlled by FACS ( $n > 5$ ). (D) Foxp3 and Helios expression of WT and *Nfat2<sup>fl/fl</sup> × Cd4-cre* CD4<sup>+</sup>CD25<sup>+</sup> iTreg from these cultures. (E)  $2 \times 10^5$  WT or *Nfat2<sup>fl/fl</sup> × Cd4-cre* iTreg depicted in C and D were injected along with  $2 \times 10^5$  CD4<sup>+</sup>CD45RB<sup>hi</sup> T cells i.v. in the *Rag2<sup>-/-</sup>* recipient mice and the BALB/c skin allograft survival was measured by log-rank test. All mice receiving only CD4<sup>+</sup>CD45RB<sup>hi</sup> cells acutely rejected their skin transplants [ $n = 5$ , mean survival time (MST) = 15 d]. Addition of *Nfat2<sup>fl/fl</sup> × Cd4-cre* iTreg prolonged skin graft survival as efficiently as WT CD4<sup>+</sup>CD25<sup>+</sup> iTreg (WT:  $n = 4$ , MST = 22.0 d; *Nfat2<sup>fl/fl</sup> × Cd4-cre*:  $n = 2$ , MST = 27 d). Shown is one representative experiment out of two.



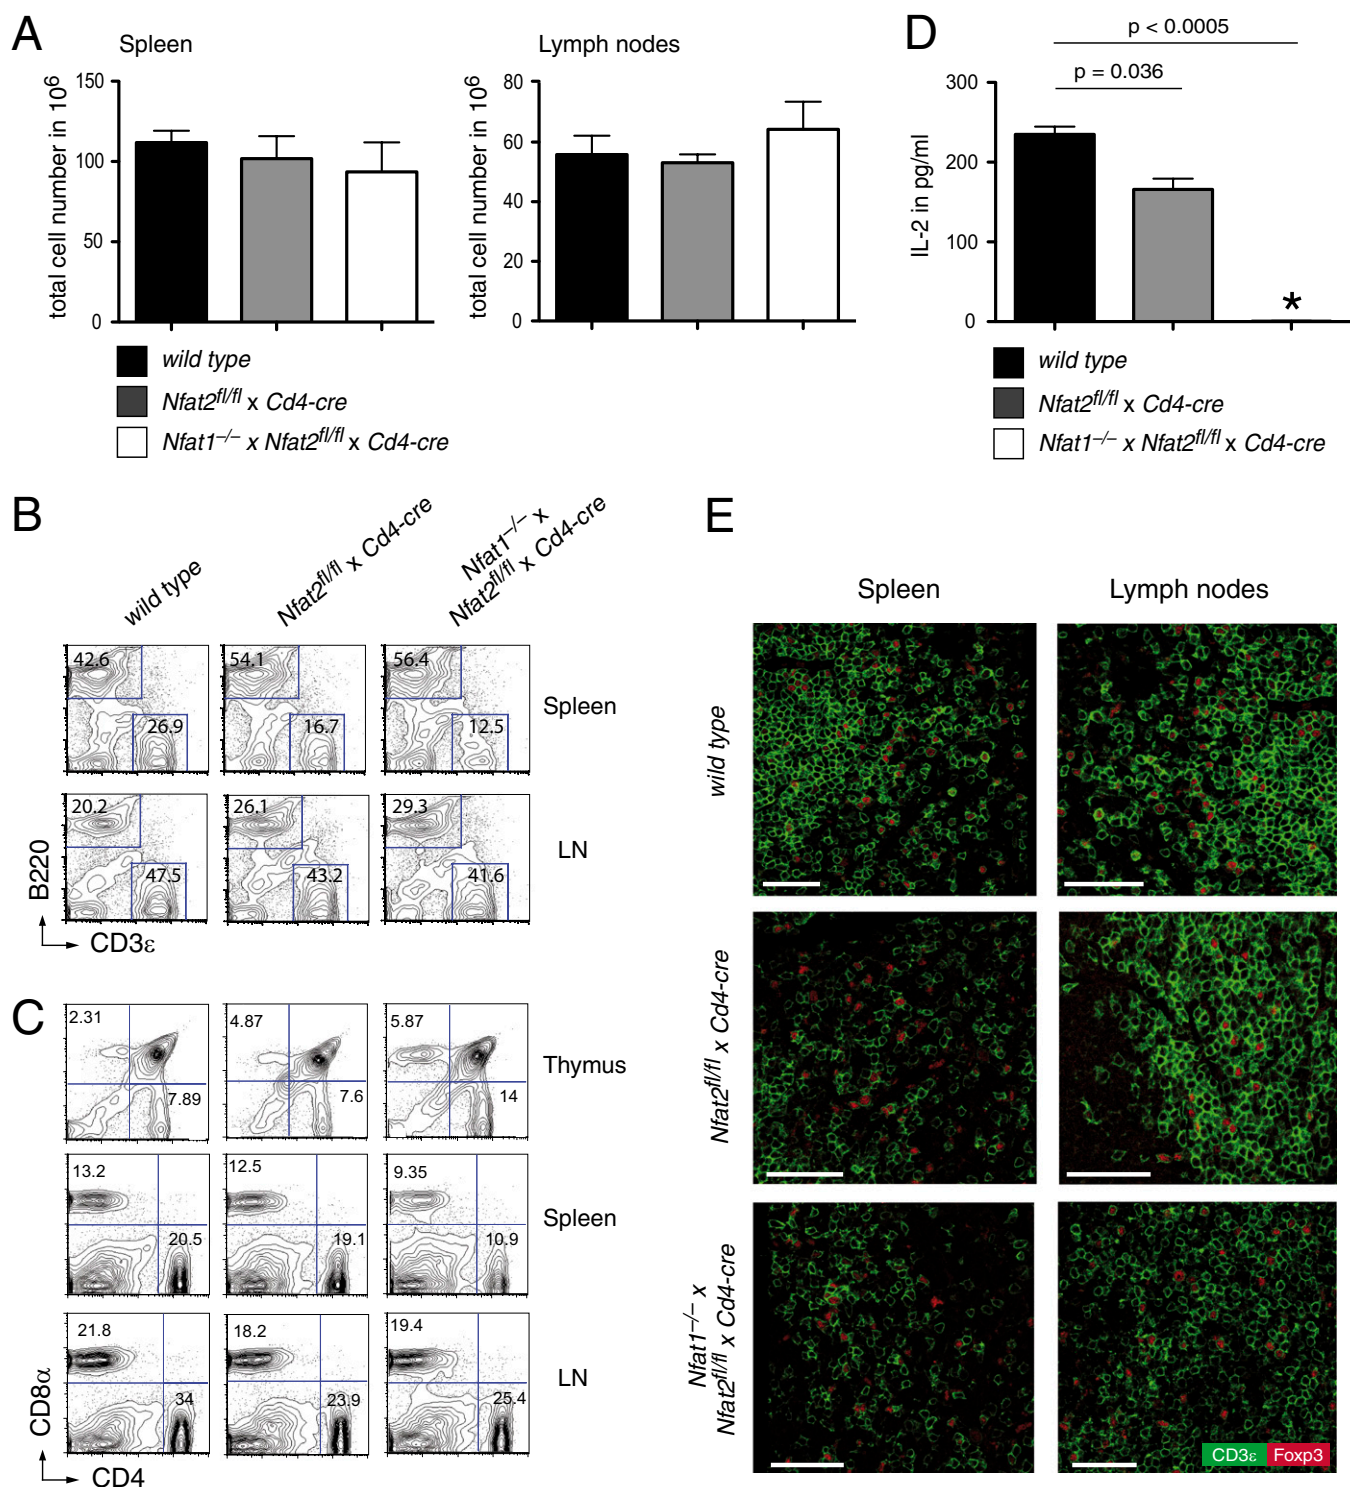





transfer of B6 WT or *Nfat2<sup>fl/fl</sup>* × *Cd4-cre* CD4<sup>+</sup>CD25<sup>+</sup> nTreg along with CD4<sup>+</sup>CD45<sup>hi</sup> T cells into a B6 *Rag2<sup>-/-</sup>* recipient mouse, receiving a BALB/c skin allograft. (E) 5 × 10<sup>5</sup> nTreg along with 2 × 10<sup>5</sup> CD4<sup>+</sup>CD45RB<sup>hi</sup> cells were injected i.v. and BALB/c skin allograft survival in the *Rag2<sup>-/-</sup>* recipient mouse was measured by log-rank test. All mice receiving only CD4<sup>+</sup>CD45RB<sup>hi</sup> cells acutely rejected their skin transplants (*n* = 5, MST = 12.8 d). Addition of WT (*n* = 4, MST = 51.0) or *Nfat2<sup>fl/fl</sup>* × *Cd4-cre* Treg (*n* = 5, MST = 60.4) prolonged skin graft survival.







from more than 100 cells out of four individual experiments. (*E* and *F*) CD4<sup>+</sup> T cells were stimulated with plate-bound anti-CD3/28 for the indicated time points, and NFAT2 nuclear translocation was recorded using confocal microscopy. Representative pictures (*E*) and the quantification of more than 30 individual cells (*F*) are shown. (*G*) Calcium-influx measurement in CD4<sup>+</sup>CD25<sup>-</sup> Tconv (red line) and CD4<sup>+</sup>CD25<sup>+</sup> nTreg cells (blue line) by real-time flow cytometry. CD4<sup>+</sup> T cells were loaded with calcium-sensitive dye Indo1-AM and stained subsequently with anti-CD25-PE and biotinylated anti-CD3<sub>ε</sub>. After 1 min the CD3<sub>ε</sub> Abs were cross-linked with streptavidin followed by the addition of 1 mM CaCl<sub>2</sub> after 3.5 min. As a positive control Iono was added after 9 min of measurement, as a negative control nonactivated cells were analyzed again as a baseline after 12 min.
